## Sub-2 Å Ewald Curvature Corrected Single-Particle Cryo-EM

Yong Zi Tan<sup>1,2,a</sup>, Sriram Aiyer<sup>3,a</sup>, Mario Mietzsch<sup>4,a</sup>, Joshua A. Hull<sup>4</sup>, Robert McKenna<sup>4</sup>,  
Joshua Grieger<sup>5</sup>, R. Jude Samulski<sup>5</sup>, Timothy S. Baker<sup>6</sup>, Mavis Agbandje-McKenna<sup>4,\*</sup>,  
Dmitry Lyumkis<sup>3,\*</sup>

<sup>1</sup>The National Resource for Automated Molecular Microscopy, Simons Electron Microscopy Center, New York Structural Biology Center, 89 Convent Ave, New York, NY 10027, USA.

<sup>2</sup>Department of Biochemistry and Molecular Biophysics, Columbia University, New York, NY 10032, USA.

<sup>3</sup>Laboratory of Genetics and Helmsley Center for Genomic Medicine, The Salk Institute for Biological Studies, La Jolla, CA 92037, USA

<sup>4</sup>Department of Biochemistry and Molecular Biology, Center for Structural Biology, The McKnight Brain Institute, College of Medicine, University of Florida, Gainesville, FL 32610, USA

<sup>5</sup>Gene Therapy Center, University of North Carolina at Chapel Hill, Chapel Hill, NC 27599, USA

<sup>6</sup>Department of Chemistry and Biochemistry and Division of Biological Sciences, University of California-San Diego, San Diego, CA 92093, USA

<sup>a</sup>These authors contributed equally to the work

*\*For materials and correspondence:* Mavis Agbandje-McKenna (mckenna@ufl.edu) and Dmitry Lyumkis (dlyumkis@salk.edu)

Keywords: high-resolution, Ewald sphere, near-atomic, structural virology, magnification anisotropy, contrast-transfer function

Word Count: 1668 words

1 **Abstract**

2 Single-particle cryogenic electron microscopy (cryo-EM) provides a powerful methodology  
3 for structural biologists, but the resolutions typically attained with experimentally determined  
4 structures have lagged behind microscope capabilities. Here, we have exploited several  
5 technical solutions to improve resolution, including sub-Angstrom pixelation, per-particle  
6 CTF refinement, and most notably a correction for Ewald sphere curvature. The application  
7 of these methods on micrographs recorded on a base model Titan Krios enabled structure  
8 determination at  $\sim 1.86\text{-\AA}$  resolution of an adeno-associated virus serotype 2 variant (AAV2),  
9 an important gene-delivery vehicle.

10

1           Single-particle cryo-EM has become a powerful tool for macromolecular structure  
2           determination, owing largely to numerous technical advances over the past decade<sup>1</sup>. Whereas  
3           near-atomic resolution ( $\sim 3\text{-}4$  Å) can now be obtained almost routinely, achieving resolutions  
4           below  $\sim 2.5$  Å remains challenging, and only one experimental cryo-EM structure has broken  
5           the nominal 2 Å barrier<sup>2</sup>. We sought to address a number of factors limiting the resolution of  
6           structure determination by single-particle cryo-EM. In these analyses, we studied a variant of  
7           adeno-associated virus (AAV) serotype 2 containing a single amino-acid substitution, L336C.  
8           The AAV2<sub>L336C</sub> variant is of particular biological interest, as it is defective in genome  
9           packaging and is associated with reduced infectivity<sup>3, 4</sup>. AAVs are single-stranded DNA  
10          viruses that infect vertebrates<sup>5</sup> and are thereby attractive vehicles for gene delivery<sup>5, 6</sup>, with  
11          AAV2 being one of the most popular serotypes for such applications. The AAV viral capsid  
12          is formed by an icosahedral (T=1)<sup>5</sup> arrangement of 60 viral protein (VP) monomers, and has  
13          a molecular weight of  $\sim 3.9$  MDa and a shell diameter of  $\sim 250$  Å. The three related capsid  
14          proteins, VP1, VP2, and VP3, share a common core sequence and occur in a predicted 1:1:10  
15          ratio<sup>7</sup>. AAV was particularly suited to our cryo-EM studies because: 1) it is relatively small  
16          for a virus and can be packed across cryo-EM grid holes in reasonably thin ice; 2) it can be  
17          stably assembled into homogeneous virus-like particles (VLPs) devoid of genomic material;  
18          and 3) it has icosahedral symmetry, which increases the number of asymmetric subunits in  
19          the dataset by 60-fold for each particle imaged.

20          To image AAV2<sub>L336C</sub> particles, we used a base model Titan Krios operating at 300  
21          keV with a K2 summit detector, without the use of newer technologies such as phase plates<sup>8</sup>,  
22          Cs correctors<sup>9</sup>, and energy filters<sup>2</sup>. For data collection, parameters such as aperture choice,  
23          beam size, magnification, camera settings, choice of stage shift for targeting and defocus  
24          range build upon optimal conditions elucidated in previous high-resolution single-particle  
25          collections<sup>2, 10</sup> and are elaborated in supplementary note 1. After recording a Zemlin tableau  
26          from a gold-coated cross-grating replica calibration grid, which revealed a coma-free aligned  
27          beam and evidence for 1.44 Å gold diffraction spots (Supplementary Fig. 1), we proceeded  
28          with collecting cryo-EM micrographs of AAV2<sub>L336C</sub> (Supplementary Fig. 2). For data  
29          processing, multiple procedures resulted in statistically significant improvements in  
30          resolution, as evidenced by changes across most frequency ranges within Fourier Shell  
31          Correlation (FSC) curves, summarized in Figure 1a. Improvements are described in spatial  
32          frequency shells, since at higher resolutions, statistically significant gains are characterized  
33          by incrementally smaller increases in nominal resolution values. First, we removed particle  
34          images with the greatest angular uncertainty based on conventional scoring criteria in either

1 Relion<sup>11</sup> or Frealign<sup>12</sup> and adjusted the weights for how different particles contribute to the  
2 reconstruction. We then performed per-particle CTF estimation using GCTF<sup>13</sup> and  
3 subsequently refined these values in *cis*TEM<sup>14</sup>, providing a cumulative gain of 46 resolution  
4 shells ( $\sim 0.3$  Å). Correcting for magnification anisotropy (estimated at  $\sim 1\%$ )<sup>15</sup> provided gains  
5 in resolution by 35 shells (0.21 Å). Notably, map resolution increased by 15 shells (0.09 Å)  
6 after correcting for the curvature of the Ewald sphere<sup>16</sup>, which has been predicted, but not  
7 previously demonstrated with experimental single-particle cryo-EM data (discussed further  
8 below). Additionally, per-frame reconstructions allowed us to determine which of the 70  
9 frames contained the most information content. Reconstructions from individual frames (each  
10 receiving a dose of  $0.32 \text{ e}^-/\text{Å}^2$ ), provided maps with resolutions ranging between 2.1 to 3.4 Å  
11 (Supplementary Fig. 3). Discarding the first 4 frames, which contained the largest beam-  
12 induced movement, improved the map by 9 resolution shells (0.05 Å), and frames 5-19 could  
13 also be combined to produce a largely identical reconstruction to one composed from frames  
14 5-70 (Fig. 1a and Supplementary Fig. 4). Finally, we found that correcting for the rotational  
15 particle movement through the course of the movie by refining the orientations of groups of  
16 five-frame averages improved low spatial frequency FSC values and the quality of the map,  
17 although the nominal value remained largely unchanged. Cumulatively, the above procedures  
18 resulted in a total gain of 71 resolution shells ( $\sim 0.4$  Å). As previously demonstrated<sup>17</sup>, the  
19 summation of individual gains is not equal to the cumulative improvement, as the effects are  
20 not additive.

21 The above results revealed that correcting for the curvature of the Ewald sphere is  
22 pertinent to experimental reconstructions in high-resolution single-particle cryo-EM analysis,  
23 warranting further investigation. Most 3D reconstruction algorithms assume that images  
24 correspond to direct projections of the 3D object, in accordance with the central slice  
25 projection theorem<sup>18</sup>. However, several aspects of cryo-EM data acquisition invalidate this  
26 approximation at resolutions approaching true atomic<sup>19, 20</sup>. Most notably, imaged objects have  
27 finite thickness along the optical axis of the microscope, which results in an inherent focus  
28 gradient during imaging. The focus gradient alters the phases and amplitudes associated with  
29 each Fourier coefficient, and the effects become progressively more pronounced at higher  
30 resolutions, lower accelerating voltages, or for thicker specimens<sup>21</sup>. Various schemes to  
31 estimate and correct for the curvature of the Ewald sphere have been developed<sup>16, 19, 20, 22</sup>, but  
32 no experimental reconstruction from a single-particle macromolecular sample has to date  
33 demonstrated improvements from taking Ewald curvature into account. The “simple-  
34 insertion” method for Ewald curvature correction implemented in Frealign9 will insert the

1 data for each particle image twice into correct Fourier coefficients related by Friedel  
2 symmetry<sup>16</sup>. This procedure, performed during reconstruction, resulted in an increase of 15  
3 resolution shells within our final map (Fig. 1a). We then evaluated the effect of the correction  
4 at lower resolution by reducing the number of particles in the reconstruction. Randomly  
5 selected subsets of the data containing an approximately equal defocus range were used to  
6 perform reconstructions with incrementally smaller numbers of particles. As few as ~60  
7 particles (3,600 asymmetric units) were sufficient to produce a ~3.5 Å map, whereas ~120  
8 particles (7,200 asymmetric units), and all larger subsets, were sufficient for <3 Å  
9 reconstructions (Supplementary Fig. 5). These maps could be used to evaluate Ewald  
10 curvature effects as a function of resolution for the ~250 Å diameter particle. Noticeable  
11 gains appeared at ~2.4-2.3 Å, and a final improvement of 15 shells (~0.1 Å) for the best  
12 reconstruction (Fig. 1b). The gains follow an increasing trend at higher resolution, as the  
13 effects of Ewald curvature become more pronounced at higher electron scattering angles<sup>19</sup>.  
14 Furthermore, the correct handedness of a reconstruction can be explicitly determined when  
15 accounting for the effects of the Ewald sphere<sup>16</sup>. Specifically, the handedness of the  
16 reconstruction defines how the Fourier coefficients are substituted in the reconstruction and  
17 whether an inversion operation must be applied to the Fourier coefficients (Supplementary  
18 Fig. 6).

19 The final map of AAV2<sub>L336C</sub> had a global resolution of 1.86 Å, with a largely  
20 homogeneous local resolution distribution within the core of the capsid shell that drops to  
21  $\geq 1.92$  Å at the solvent exposed surfaces (Fig. 1c-d and Supplementary Table 1). Using this  
22 map, an atomic model was derived for the common region of the VP monomer, residues 226  
23 to 735 (VP1 numbering), which was symmetry expanded by icosahedral matrix  
24 multiplication to produce the full 60-mer viral capsid. As in previously reported AAV  
25 structures, the VP1u, VP1/2 common sequence, and the N-terminus of common VP3 are  
26 disordered. The final model corresponded closely to the map, with good statistics  
27 (Supplementary Table 1), including a high EM-Ringer<sup>23</sup> score of 8.49 and a correlation  
28 coefficient following model refinement in Phenix of 0.849<sup>24</sup>. The EM-Ringer score reflects  
29 accuracy of fit between model and map based on side-chain rotameric positions. At this  
30 resolution, the map is of sufficient quality to see numerous features with unprecedented detail  
31 (Fig. 2 and Supplemental Movie 1) including: 1) the backbone tracing with well-defined  
32 carbonyls; 2) explicit structure to most side-chains, rotamers, holes in aromatic residues, as  
33 well as prolines and associated puckers; 3) ordered solvent throughout the structure,

1 including primary and secondary hydration shells; and 4) the distinct appearance of density  
2 for individual oxygens of carboxylate groups, which occasionally begin to show traces of H-  
3 bonding geometry.

4 Efforts to improve the AAV gene delivery system have focused on structure-function  
5 analysis of the viral life cycle and of engineered capsids to improve therapeutic efficacy. The  
6 1.86-Å resolution structure of AAV2<sub>L336C</sub> represents the most accurately interpreted AAV  
7 capsid model thus far (Fig. 3). This particular variant also exhibits specific structural changes  
8 that are clearly captured in the density map, and these changes may be associated with  
9 infectivity defects (Supplementary Note 2 and Supplementary Fig. 7). High-resolution  
10 structural information can aid the annotation of: 1) water networks required to stabilize the  
11 capsid structure assembly and involved in its function; 2) the protonation states of acidic and  
12 histidine residues important for interactions in the endo/lysosomal pathway; 3) capsid  
13 interactions with the transcription machinery and during capsid assembly; and 4) precise  
14 receptor and antibody interactions. Details from such analyses can guide the engineering of  
15 AAVs at specific residues to eliminate interactions, such as those with pre-existing host  
16 immune system molecules, or improve function, such as specific tissue targeting. Notably,  
17 the number of known sites of interaction between the AAV ligand and host receptor/antibody  
18 far exceeds the number of experimentally derived AAV models. For this reason, the fact that  
19 high-resolution structures of AAV variants can be derived with as few as ~100 particles  
20 (Supplementary Fig. 5) is noteworthy and will accelerate the compilation of a comprehensive  
21 structural understanding of AAV:host interactions<sup>5</sup>.

22 The methods described herein provide a feasible route toward true atomic resolution  
23 in cryo-EM single-particle analysis. While we used a well-behaved sample for this work, the  
24 modest amount of time (3.5 days collection) and equipment (a base model Titan Krios and  
25 K2 Summit camera) used for this reconstruction would make our strategy generally  
26 applicable, even though the relative gains will differ by specimen (Supplementary Fig. 8).  
27 Correcting for the curvature of the Ewald sphere should be incorporated into reconstruction  
28 algorithms and may have particular relevance for improving resolution for samples collected  
29 at lower microscope accelerating voltage<sup>25</sup>. Finally, our sub-2 Å resolution reconstruction  
30 AAV2<sub>L336C</sub> also provides new insights into AAV life cycle and biology that will be  
31 invaluable for improving the effectiveness of AAV as a delivery vehicle in gene therapy  
32 applications.

33

## 1 **Acknowledgements**

2 Molecular graphics and analyses were performed with the UCSF Chimera package  
3 (supported by NIH P41 GM103331). We thank Bill Anderson at TSRI for help with EM data  
4 collection. We also thank David DeRosier and Gordon Louie for critical reading of the  
5 manuscript. The work was supported by Agency for Science, Technology and Research  
6 Singapore (to Y.Z.T.); NIH R01 GM109524 (to R.M. and M.A.M.), R01GM033050 (to  
7 T.S.B.), and NIH R01AI136680-01 (to D.L.). We acknowledge consultations with Bridget  
8 Carragher and Clinton S. Potter. Some of the work was performed at the National Resource  
9 for Automated Molecular Microscopy at the Simons Electron Microscopy Center which is  
10 supported by National Institute of General Medical Sciences (GM103310), Simons  
11 Foundation (SF349247) and NYSTAR.

12

## 13 **Accession codes and deposition**

14 All raw movie frames, micrographs, the particle stack and relevant metadata files will be  
15 deposited into EMPIAR. The electron density map will be deposited into EMDB. The model  
16 will be deposited into PDB.

17

## 18 **Author Contributions**

19 J.G. generated the baculovirus construct. J.A.H. purified the sample. D.L. and S.A. vitrified  
20 the sample and collected the data. Y.Z.T., D.L., and S.A. processed the data. D.L., M.M.,  
21 Y.Z.T. and S.A. built and refined the model. M.A.M., R.J.S., T.S.B. and R.M. conceived the  
22 variant study. D.L. and Y.Z.T. conceived the high-resolution study. T.S.B., M.A.M. and D.L.  
23 supervised throughout the experiment. All authors read and contributed to the manuscript.

24

## 25 **Conflict of Interest Statement**

26 M.A.M. is a SAB member for Voyager Therapeutics, Inc., and AGTC, has a sponsored  
27 research agreement with AGTC and Voyager Therapeutics, and is a consultant for Intima  
28 Biosciences, Inc. M.A.M. is a co-founder of StrideBio, Inc. This is a biopharmaceutical  
29 company with interest in developing AAV vectors for gene delivery application. R.J.S. is the  
30 scientific founder of Bamboo Therapeutics, Asklepios Biopharmaceutics, Chatham  
31 Therapeutics, and Merlin. These companies also have interest in the development of AAV for  
32 gene delivery applications.

33

## 1 **Figures**

2 **Figure 1 | Procedures and implications for obtaining a sub-2 Å resolution**  
3 **reconstruction of AAV2<sub>L336C</sub>.** (a) Fourier shell correlation (FSC) curves showing  
4 independent contributions of each operation to the final resolution. Each FSC curve was  
5 generated by “turning off” one of the respective operations from the final refinement (1A).  
6 Correcting for rotational beam-induced movement (1B) improves the FSC at low spatial  
7 frequency. Discriminating particles based on their score (3) led to a lower resolution  
8 reconstruction (1.89 Å) as compared to equally weighting all particles (1.84 Å). Cumulative  
9 loss of “turning off” all the tested operations is indicated by (7). (b) ResLog<sup>26</sup> plot of the  
10 dataset, with (green) and without (red) Ewald sphere curvature correction in Frealign9. Five  
11 replicates were performed for each data point with random particle distributions. The  
12 resolution limits predicted by DeRosier<sup>19</sup> and Spence<sup>21</sup> for a 250 Å macromolecule are  
13 indicated. (c) Fourier shell correlation (FSC) curves describing the half-map (blue) and map-  
14 to-model (purple) resolutions, as well as histogram of directional resolutions sampled evenly  
15 over the 3DFSC<sup>27</sup> (yellow), and corresponding sphericity value. (d) 1.86 Å reconstruction of  
16 the AAV2 viral capsid using single-particle cryo-EM, colored by local resolution<sup>28</sup>. Slices  
17 through the reconstruction displayed in sub-panels i-iii start from the capsid center (i) and  
18 move progressively towards the front (ii and iii). These show few deviations from the global  
19 resolution, with the best local resolution at 1.78 Å (primarily located inside the core region of  
20 the capsid shell).

21



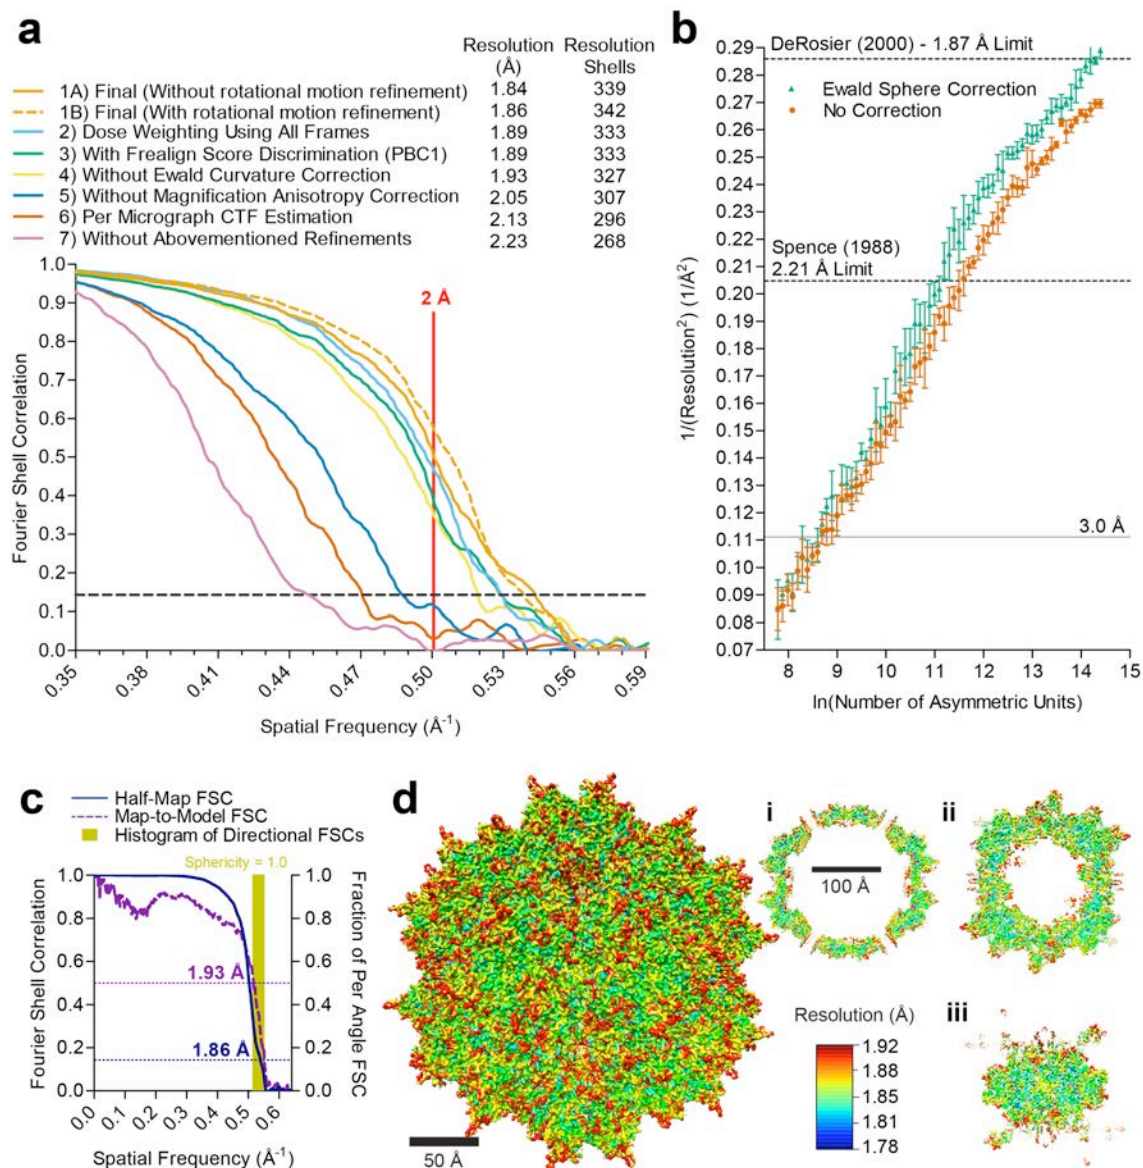

1 **Figure 2 | High-resolution information within the 1.86 Å reconstruction of AAV2<sub>L336C</sub>.**  
2 (a) Stereo view of a slice through the map and model containing both amino acid residues  
3 and water molecules. (b) Stereo view of a slice through a beta sheet. (c) Map densities for  
4 each of the 20 types of amino acid residues. The amino acid residues are shown as stick  
5 representation and colored according to atom type: C=yellow, O=red, N=blue, S=green  
6 inside either a translucent solid density (a,b) or black mesh density map (c). H=white atoms  
7 are displayed for (c).

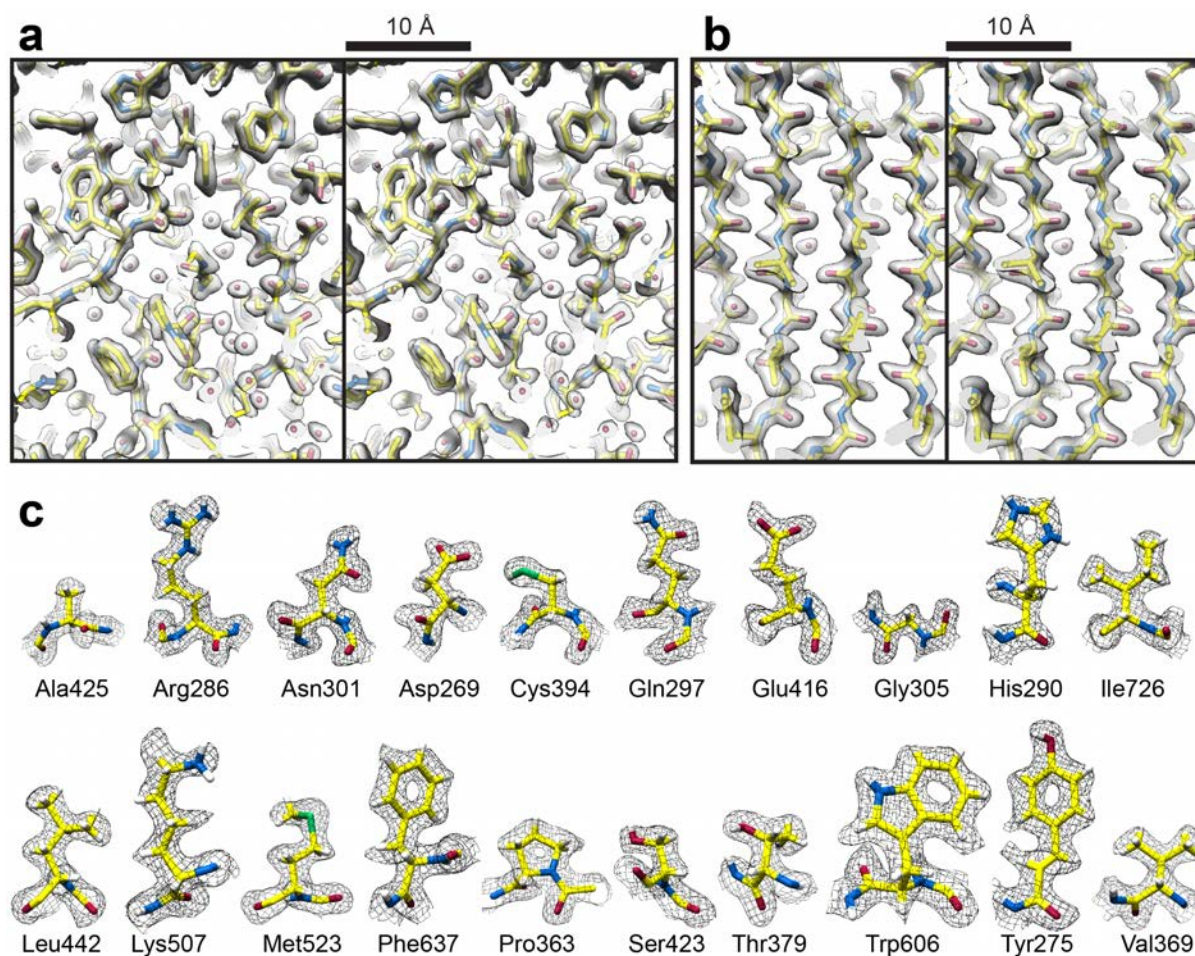

1 **Figure 3 | High-resolution map aids in placement of correct rotamers for AAV2<sub>L336C</sub>.** At  
2 1.86 Å (map in black mesh), uncertainty in rotamer and backbone conformation in a previous  
3 model of AAV2 (1LP3, in cyan) determined by X-ray crystallography to 3.0 Å resolution can  
4 now be accurately modelled (yellow).  
5

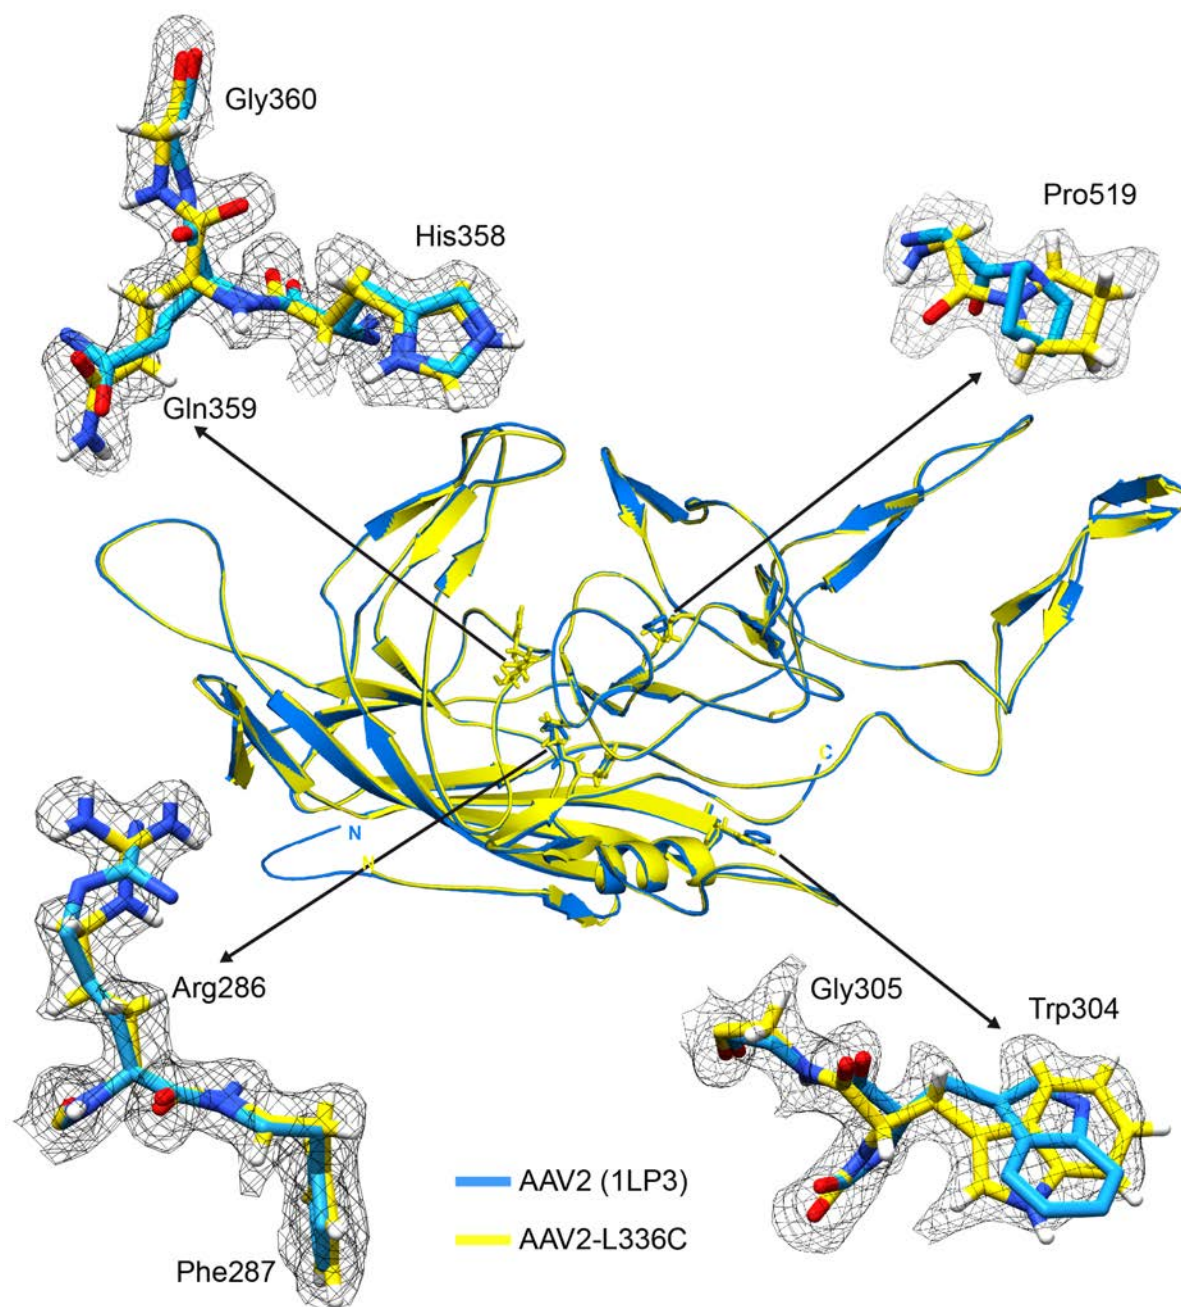

6

## 1 References for Main Text

- 2 1. Elmlund, D., Le, S.N. & Elmlund, H. High-resolution cryo-EM: the nuts and bolts. *Current*  
3 *opinion in structural biology* **46**, 1-6 (2017).
- 4 2. Merk, A. et al. Breaking cryo-EM resolution barriers to facilitate drug discovery. *Cell* **165**,  
5 1698-1707 (2016).
- 6 3. Bleker, S., Sonntag, F. & Kleinschmidt, J.A. Mutational analysis of narrow pores at the  
7 fivefold symmetry axes of adeno-associated virus type 2 capsids reveals a dual role in  
8 genome packaging and activation of phospholipase A2 activity. *Journal of virology* **79**, 2528-  
9 2540 (2005).
- 10 4. Grieger, J.C., Johnson, J.S., Gurda-Whitaker, B., Agbandje-McKenna, M. & Samulski, R.J.  
11 Surface-exposed adeno-associated virus Vp1-NLS capsid fusion protein rescues infectivity of  
12 noninfectious wild-type Vp2/Vp3 and Vp3-only capsids but not that of fivefold pore mutant  
13 virions. *Journal of virology* **81**, 7833-7843 (2007).
- 14 5. Agbandje-McKenna, M. & Kleinschmidt, J. in Adeno-Associated Virus 47-92 (Springer, 2012).
- 15 6. Lu, Y. Recombinant adeno-associated virus as delivery vector for gene therapy—a review.  
16 *Stem cells and development* **13**, 133-145 (2004).
- 17 7. Snijder, J. et al. Defining the stoichiometry and cargo load of viral and bacterial nanoparticles  
18 by Orbitrap mass spectrometry. *Journal of the American Chemical Society* **136**, 7295-7299  
19 (2014).
- 20 8. Danev, R. & Baumeister, W. Cryo-EM single particle analysis with the Volta phase plate. *Elife*  
21 **5** (2016).
- 22 9. Fischer, N. et al. Structure of the E. coli ribosome–EF-Tu complex at < 3 Å resolution by C s-  
23 corrected cryo-EM. *Nature* **520**, 567 (2015).
- 24 10. Campbell, M.G., Veessler, D., Cheng, A., Potter, C.S. & Carragher, B. 2.8 Å resolution  
25 reconstruction of the Thermoplasma acidophilum 20S proteasome using cryo-electron  
26 microscopy. *Elife* **4** (2015).
- 27 11. Scheres, S.H. RELION: implementation of a Bayesian approach to cryo-EM structure  
28 determination. *J Struct Biol* **180**, 519-530 (2012).
- 29 12. Grigorieff, N. FREALIGN: An Exploratory Tool for Single-Particle Cryo-EM. *Methods Enzymol*  
30 **579**, 191-226 (2016).
- 31 13. Zhang, K. Gctf: Real-time CTF determination and correction. *J Struct Biol* **193**, 1-12 (2016).
- 32 14. Grant, T., Rohou, A. & Grigorieff, N. cisTEM, user-friendly software for single-particle image  
33 processing. *Elife* **7** (2018).
- 34 15. Grant, T. & Grigorieff, N. Automatic estimation and correction of anisotropic magnification  
35 distortion in electron microscopes. *Journal of Structural Biology* **192**, 204-208 (2015).
- 36 16. Wolf, M., DeRosier, D.J. & Grigorieff, N. Ewald sphere correction for single-particle electron  
37 microscopy. *Ultramicroscopy* **106**, 376-382 (2006).
- 38 17. Liu, Z., Guo, F., Wang, F., Li, T.-C. & Jiang, W. 2.9 Å resolution cryo-EM 3D reconstruction of  
39 close-packed virus particles. *Structure* **24**, 319-328 (2016).
- 40 18. Crowther, R. Procedures for three-dimensional reconstruction of spherical viruses by Fourier  
41 synthesis from electron micrographs. *Phil. Trans. R. Soc. Lond. B* **261**, 221-230 (1971).
- 42 19. DeRosier, D.J. Correction of high-resolution data for curvature of the Ewald sphere.  
43 *Ultramicroscopy* **81**, 83-98 (2000).
- 44 20. Jensen, G.J. & Kornberg, R.D. Defocus-gradient corrected back-projection. *Ultramicroscopy*  
45 **84**, 57-64 (2000).
- 46 21. Zhang, X. & Zhou, Z.H. Limiting factors in atomic resolution cryo electron microscopy: no  
47 simple tricks. *Journal of structural biology* **175**, 253-263 (2011).
- 48 22. Russo, C.J. & Henderson, R. Ewald sphere correction using a single side-band image  
49 processing algorithm. *Ultramicroscopy* (2018).
- 50 23. Barad, B.A. et al. EMRinger: side chain–directed model and map validation for 3D cryo-  
51 electron microscopy. *Nature methods* **12**, 943 (2015).

- 1 24. Adams, P.D. et al. PHENIX: a comprehensive Python-based system for macromolecular  
2 structure solution. *Acta Crystallographica Section D: Biological Crystallography* **66**, 213-221  
3 (2010).
- 4 25. Herzik Jr, M.A., Wu, M. & Lander, G.C. Achieving better-than-3-Å resolution by single-  
5 particle cryo-EM at 200 keV. *nature methods* **14**, 1075 (2017).
- 6 26. Stagg, S.M., Noble, A.J., Spilman, M. & Chapman, M.S. ResLog plots as an empirical metric of  
7 the quality of cryo-EM reconstructions. *Journal of structural biology* **185**, 418-426 (2014).
- 8 27. Tan, Y.Z. et al. Addressing preferred specimen orientation in single-particle cryo-EM through  
9 tilting. *Nature methods* **14**, 793 (2017).
- 10 28. Hohn, M. et al. SPARX, a new environment for Cryo-EM image processing. *Journal of*  
11 *structural biology* **157**, 47-55 (2007).
- 12

## 1 **Supplementary Note 1 | Imaging Conditions**

2 For sample preparation, we used gold grids to reduce beam-induced movement<sup>29</sup>. For  
3 microscopy, we selected the smallest available C2 condenser aperture (70  $\mu\text{m}$  on our Titan  
4 Krios) to maximize beam coherence. The spot size was selected to yield a beam diameter of  
5  $\sim 2 \mu\text{m}$  to allow for complete illumination of the imaged hole, while ensuring that the imaged  
6 area is within range of parallel illumination<sup>30</sup>. During data acquisition, we used a relatively  
7 high magnification (37kx, corresponding to a pixel size of 0.788  $\text{\AA}$ ) to boost the detective  
8 quantum efficiency (DQE) of the direct electron detector (Gatan K2 Summit) at a fixed  
9 spatial resolution<sup>31, 32</sup>. Super-resolution mode boosted the final pixel size to 0.394  $\text{\AA}$ , which  
10 facilitates reaching close to or even beyond physical Nyquist in the reconstructed map<sup>31</sup>  
11 while maintaining an otherwise identical field of view. During imaging, the microscope stage  
12 shift<sup>10</sup> (rather than beam tilt-induced image shift) was used to center the specimen field of  
13 view so as to minimize beam tilt (and the concomitant effects of coma) within the final  
14 images, and a 60 s delay before the exposure was implemented to reduce grid movement due  
15 to thermal instability. A frame rate of 20 frames / sec (50 ms frames) was used to correct for  
16 beam-induced motion<sup>33</sup>, although a running average of 3 sequential frames was subsequently  
17 determined to be an optimal setting for frame alignment. A dose of  $\sim 4 \text{ e}^-/\text{pixel/s}$  on the K2  
18 Summit detector was selected to reduce coincidence loss and maximize the camera DQE<sup>31</sup>.  
19 With the above procedures, a coma-free microscope alignment allowed for observation of the  
20 2.36, 2.04 and 1.44  $\text{\AA}$  diffraction spots from the gold-shadowed cross-grating replica  
21 calibration grid (Supplementary Fig. 1). This result indicated that the aligned microscope was  
22 capable of capturing high resolution information in recorded images. While the above-  
23 mentioned settings may differ slightly between microscopes and facilities, any employed  
24 procedures should result in high-resolution diffraction spots, as shown in Supplementary Fig.  
25 1, to maximize data quality. Data collection throughput was aided by automation using  
26 Legikon<sup>34</sup> across the 3.5-day-long session. We collected 1,317 micrographs of AAV2<sub>L336C</sub>  
27 particles, which after extensive pruning and classification (see Methods) provided a dataset  
28 of 30,515 particles for refinement (Supplementary Fig. 2 and Supplementary Table 1).

29

1 **Supplementary Note 2 | Structural Comparison of AAV2<sub>L336C</sub> and AAV2<sub>WT</sub>**

2 The density for C336 is clearly ordered in the AAV2<sub>L336C</sub> map, and the model is considerably  
3 improved compared with the prior structure of AAV2<sub>WT</sub> (Fig. 3)<sup>35</sup>. There is a 1.4 Å shift of  
4 the main-chain of C336 and neighboring residues, compared to AAV2<sub>WT</sub> (Supplementary  
5 Fig. 7a). This results in a 0.8 Å widening at the base of the 5-fold channel formed by five  
6 symmetry related DE loops (the loop between the βD and βE strands). In addition, the  
7 AAV2<sub>WT</sub> structure is ordered from residue 217 to 735, with the additional N-terminal  
8 residues compared to AAV2<sub>L336C</sub> (residues 226 to 735) occupying the base of the interior  
9 opening of the 5-fold channel (Supplementary Fig. 7b). The AAV2<sub>L336C</sub> variant displays a 2-  
10 3-fold defect in genome packaging compared to AAV2<sub>WT</sub> and lacks PLA2 activity resulting  
11 in a defect in infectivity<sup>3,4</sup>. This defect was proposed to be due to the inability to expose the  
12 PLA2 and potential structural differences to AAV2<sub>WT</sub>. The annotated differences in  
13 AAV2<sub>L336C</sub> support these possibilities. An altered location of the PLA2 domain due to the N-  
14 terminal disorder would abrogate its externalization via the 5-fold pore and thus its function.  
15

1 **Supplementary Figure 1 | High-resolution information is present within micrographs.**

2 Zemlin tableau recorded under cryogenic conditions showing power spectra of images of a  
3 gold-coated carbon cross-grating replica grid, acquired with a 5 mrad beam tilt in the  
4 respective direction, and subsequent to coma-free microscope alignment. Gold diffraction  
5 spots at 2.355 Å (averaging to a nearly concentric ring), 2.039 Å, and 1.442 Å are evident  
6 within the series of power spectra. Arrows point to faint diffraction spots visible at 1.442 Å.

7

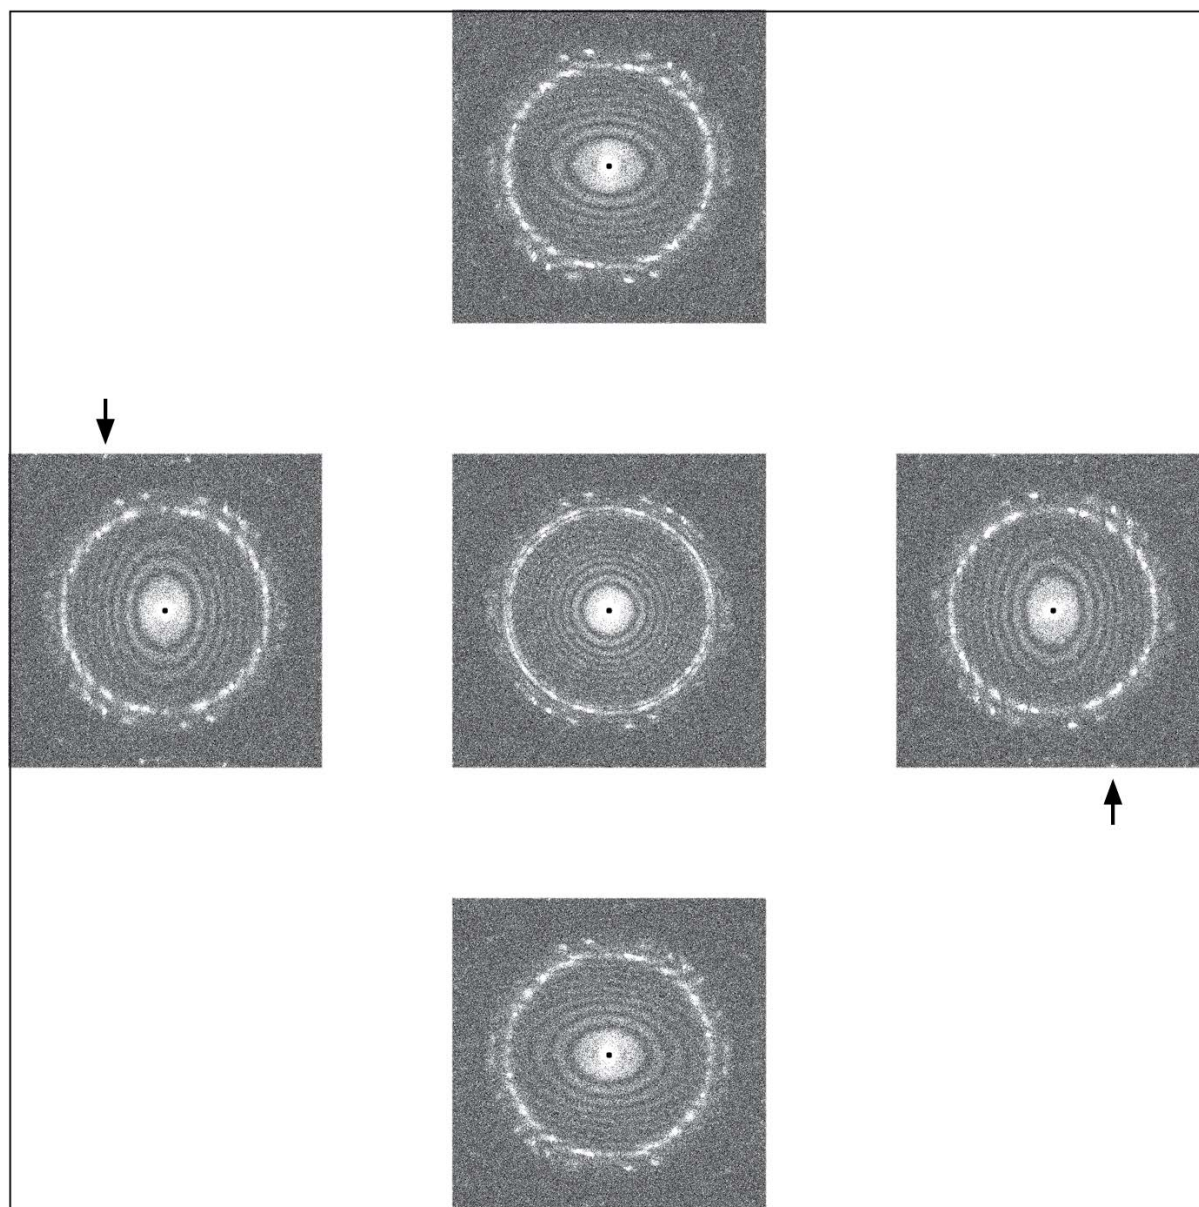

8

9



1 **Supplementary Figure 2 | Raw cryo-EM data.** (a) A cryo-EM micrograph of the  
2 AAV2<sub>L336C</sub> imaged on a Titan Krios with a Gatan K2 summit direct detector at -1.19  $\mu\text{m}$   
3 defocus, estimated using CTFFind4. (b) CTF estimation profile from Appion<sup>36</sup>, showing  
4 agreement of the Thon rings and estimated CTF profile at 80% confidence to 3.21  $\text{\AA}$ . (c) 2D  
5 class averages of AAV2<sub>L336C</sub> aligned using Relion.  
6

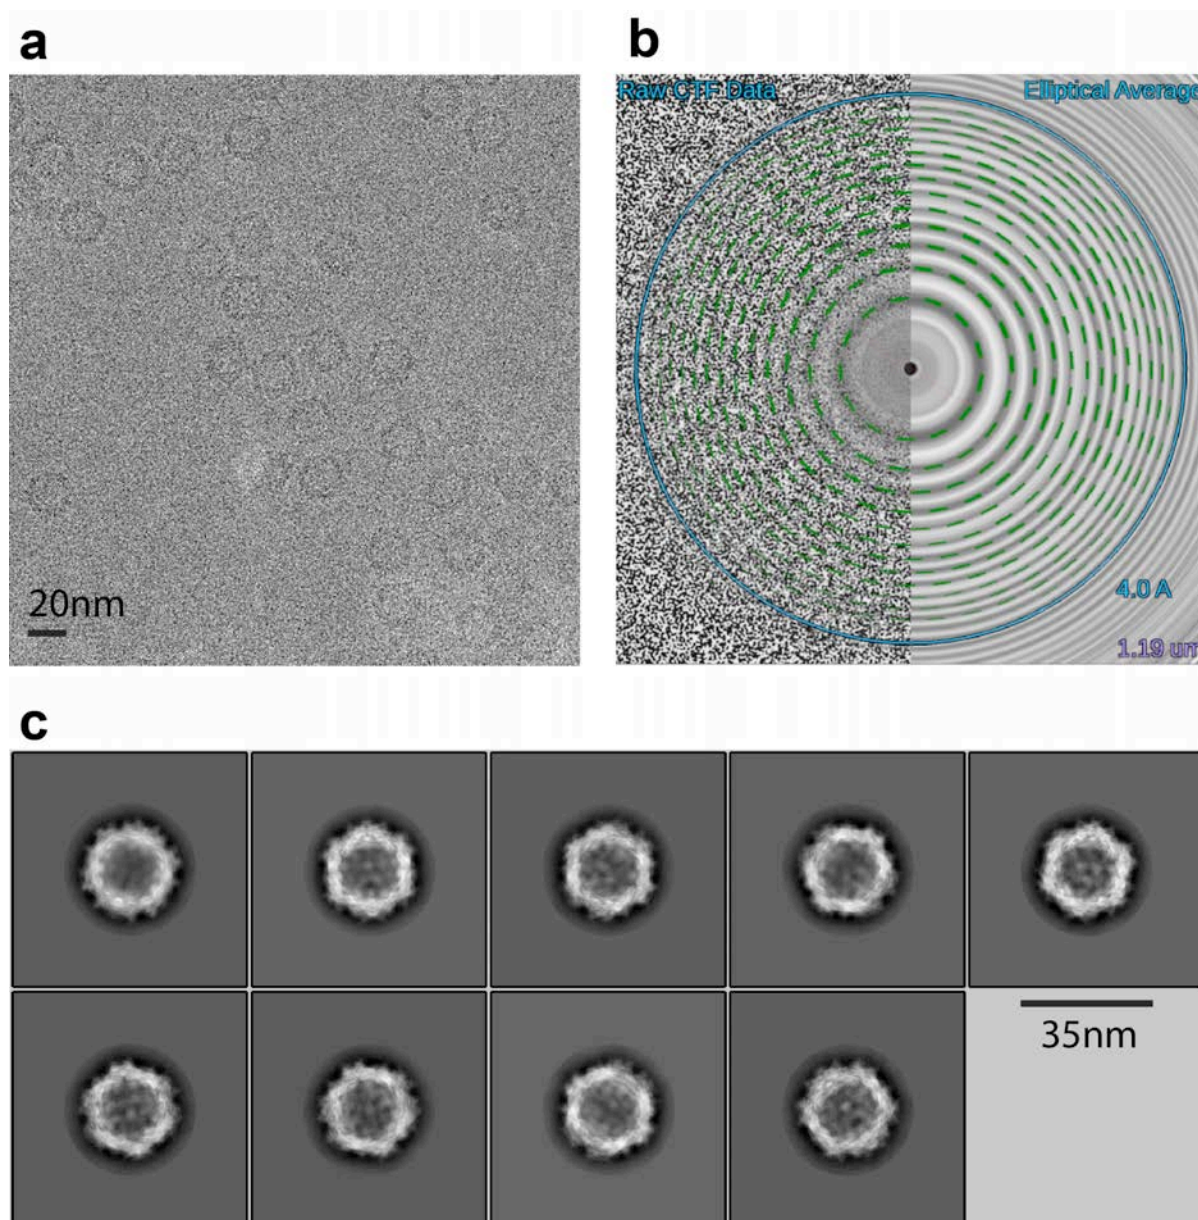

7  
8  
9

1 **Supplementary Figure 3 | Resolution of individual frame reconstructions.** Using the best  
2 Euler angles and shifts, reconstructions were computed separately for each of the 70 frames.  
3 The resulting resolution shows two trends: the first 4 frames (3.17-2.43 Å) suffered from the  
4 initial effects of beam-induced motion; after frame 22, the resolution gradually worsens  
5 owing to the cumulative effects of radiation damage.

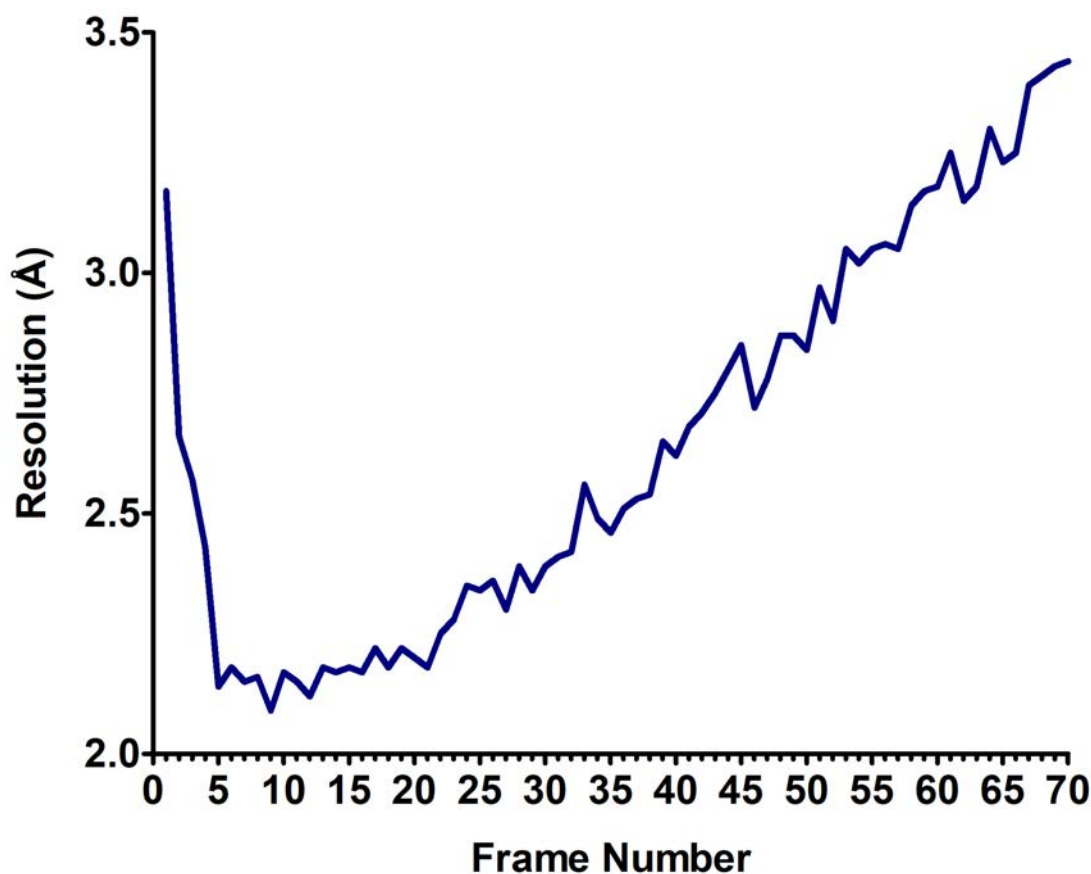

6

7

1 **Supplementary Figure 4 | Effect of removal of first frames.** Removing the first 4 frames  
2 that exhibit the most beam-induced movement, and consequently the lowest resolution (see  
3 Supplementary Fig. 3), either from the subset of frames 5-19 (2) or from the cumulative,  
4 dose-weighted sum containing frames 5-70 (3) produces measurable resolution gains.

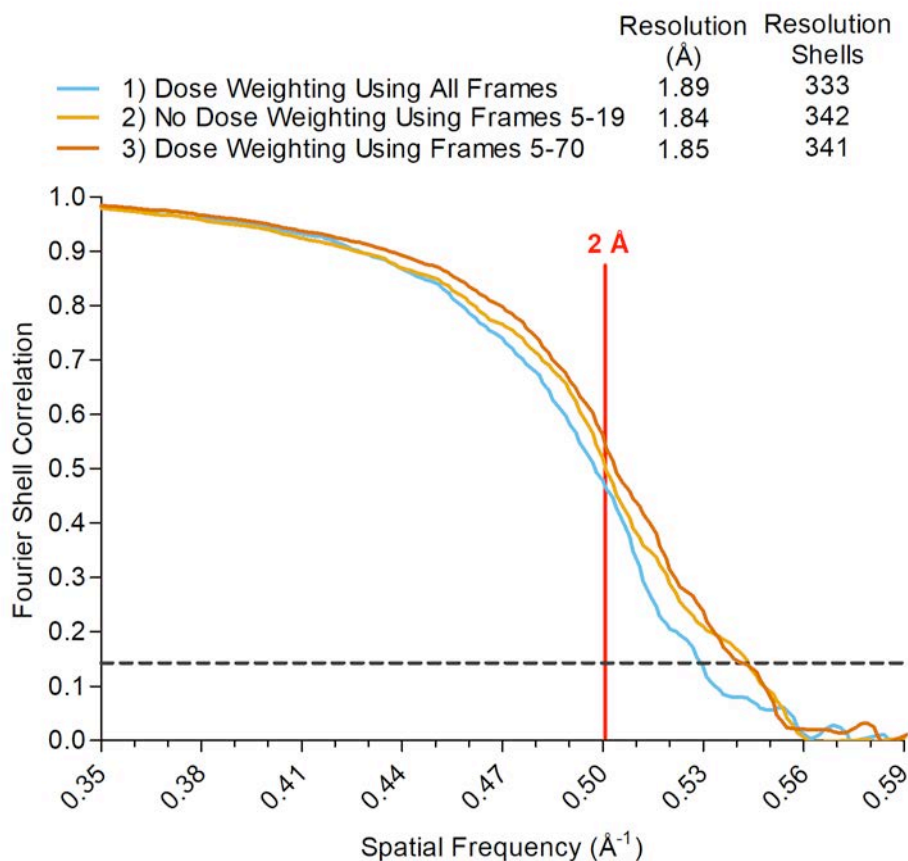

5

1 **Supplementary Figure 5 | Improvement in resolution with increasing particle number.**

2 Reconstructions were performed with subsets of the particles, before rotational motion  
3 correction. (a) FSC curves, (b) a plot of nominal resolution value (expressed in inverse  $\text{\AA}^2$ ) as  
4 a function of the number of asymmetric units (ASUs), and (c) views of the density maps  
5 showing structural features for each corresponding reconstruction. Water molecules and  
6 holes in aromatic residues become obvious at beyond 2.10  $\text{\AA}$ .

7  
8

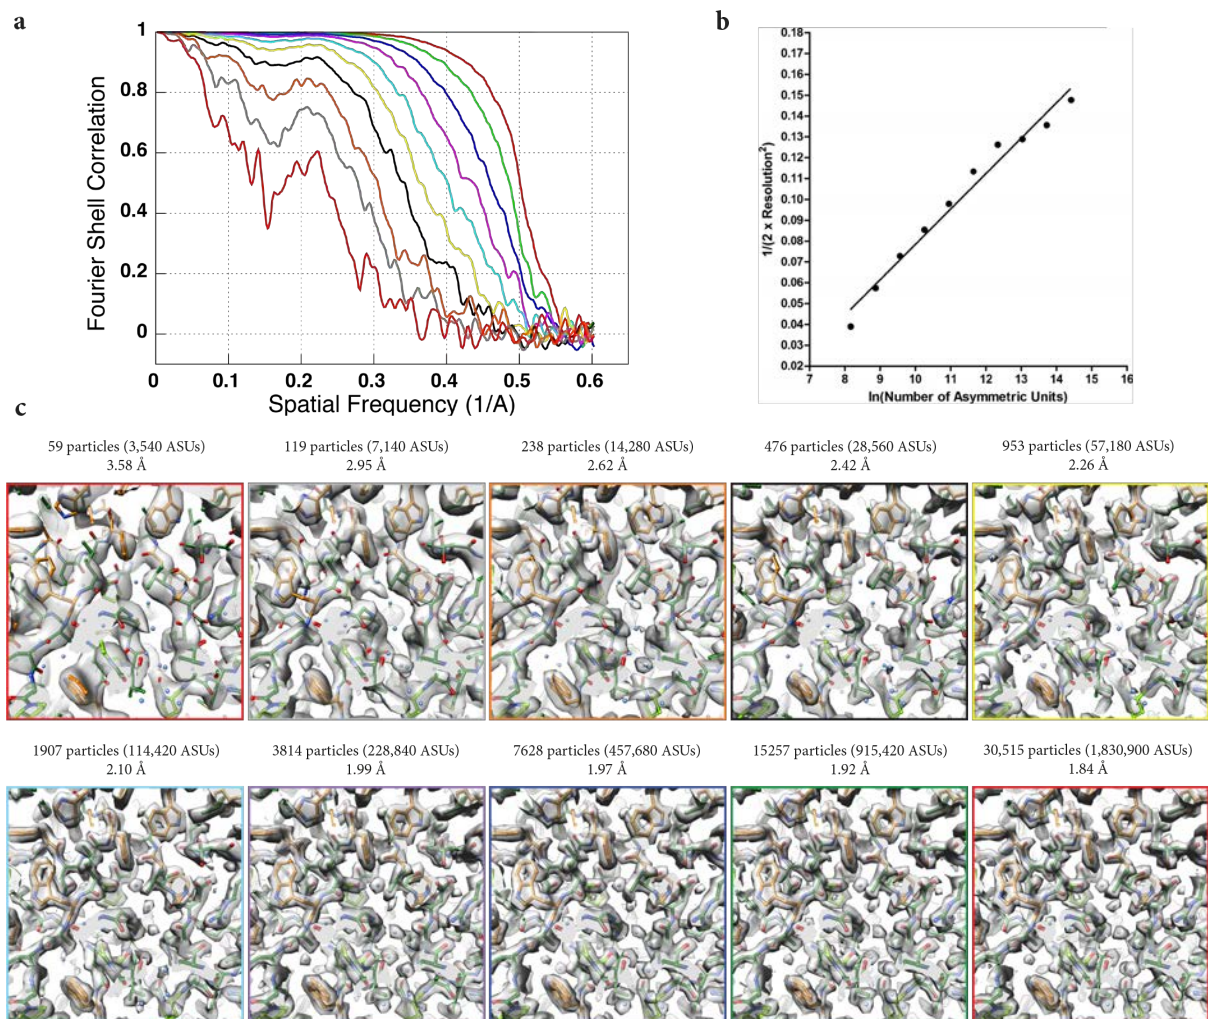

9  
10

1 **Supplementary Figure 6 | Accounting for Ewald sphere curvature improves cryo-EM**  
2 **resolutions and allows for determination of map handedness.** A map reconstructed  
3 without correcting for the curvature of the Ewald sphere and using orientation parameters  
4 accounting for (1) the correct or (4) opposite map handedness have identical resolutions.  
5 Accounting for the curvature of the Ewald sphere during the reconstruction for the correct-  
6 handed map improves resolution (2), whereas the same operation performed on a  
7 reconstruction of the opposite-handed map decreases the resolution (5). Analogously, an  
8 inversion of the Fourier coefficients during Ewald curvature correction, if applied to the  
9 correct-handed map, decreases resolution (3), whereas this same operation performed during  
10 the reconstruction of the opposite-handed map effectively restores all high-resolution  
11 components (6). These sets of operations allow for automated determination of handedness in  
12 high resolution cryo-EM maps in the absence of auxiliary data, as previously theorized<sup>16, 22</sup>.  
13

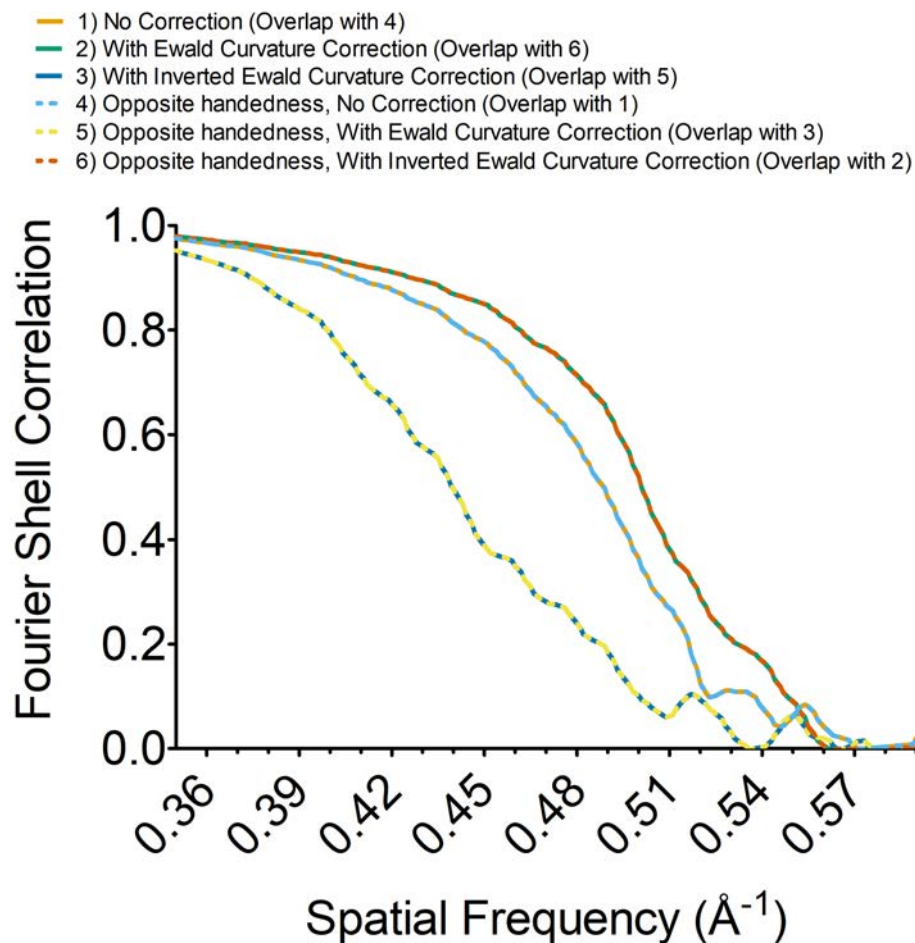

14  
15  
16

1 **Supplementary Figure 7 | Comparison of AAV2<sub>WT</sub> and AAV2<sub>L336C</sub>.** (a) The density map  
2 with the modeled residues for the DE-loop for AAV2<sub>WT</sub> and AAV2<sub>L336C</sub>. The wild type L336  
3 and substituted C336 residues are shown. The AAV2<sub>WT</sub> has been the highest resolution  
4 density map for AAV2 published to date, at 3 Å. The amino acid residues are shown as stick  
5 representation and colored according to atom type: C=yellow, O=red, N=blue, H=white,  
6 S=green inside a black mesh density map. (b) Superposed pentamer models of AAV2<sub>WT</sub>  
7 (blue) and AAV2<sub>L336C</sub> (yellow). Lower panel show close-up views of the 5-fold region as  
8 side view and top view perspectives. Side-chain atoms for individual residues of interest  
9 shown.

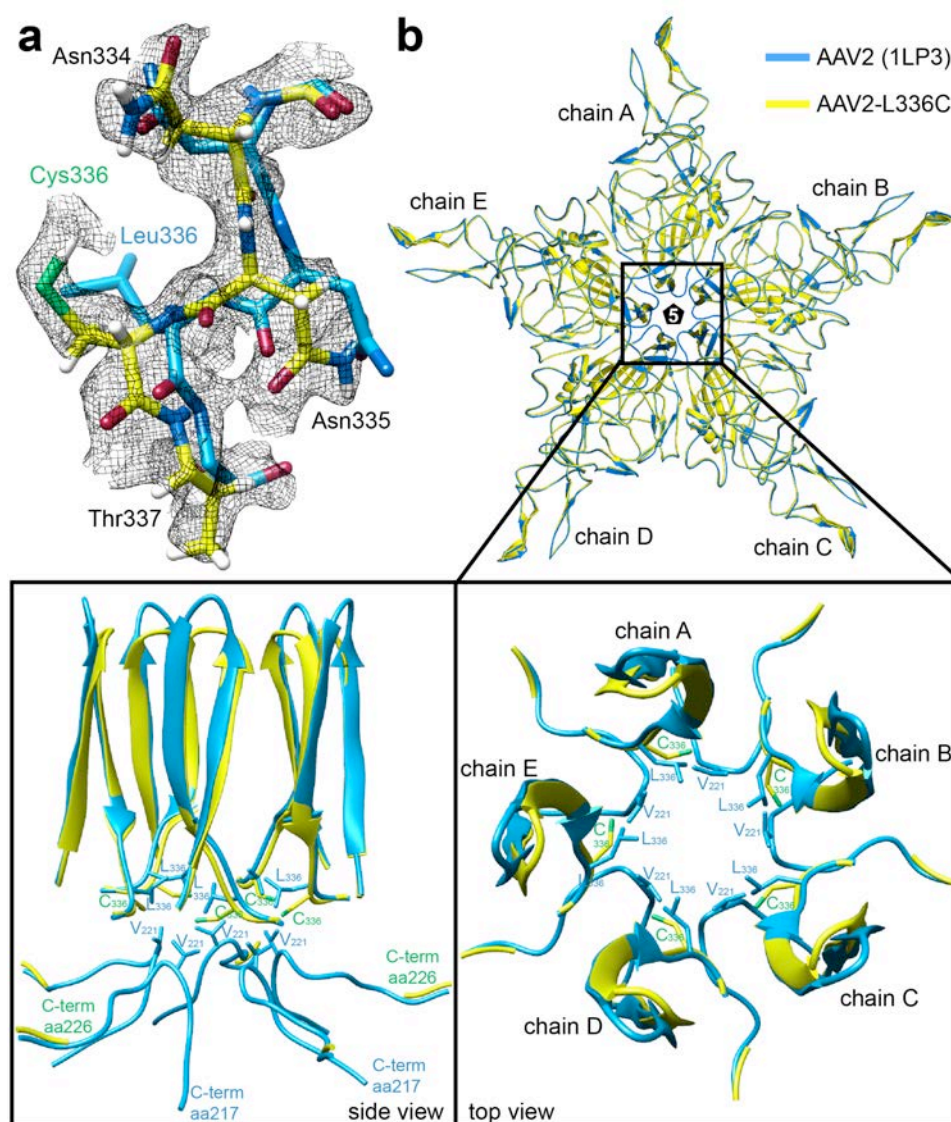

10

11

1 **Supplementary Figure 8 | Improvement of a previously published dataset with per-**  
2 **particle CTF estimation.** Resolution curves describing reconstructions of the 60S ribosomal  
3 subunit from Passos *et al.*<sup>37</sup> (green) and from this work, after applying per-particle CTF  
4 estimation (red). At these resolutions, correcting for the curvature of the Ewald sphere did not  
5 significantly improve the map, in line with our observations with AAV2<sub>L336C</sub>.  
6

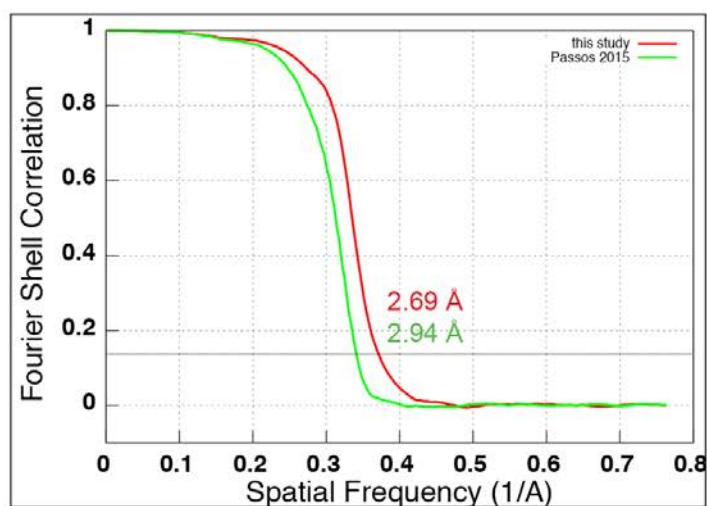

7

1 **Supplementary Table 1 | Cryo-EM data collection and modeling statistics.**

| <b>AAV2<sub>L336C</sub></b>                                                                                                                                                                                                                              |                                         |
|----------------------------------------------------------------------------------------------------------------------------------------------------------------------------------------------------------------------------------------------------------|-----------------------------------------|
| <b>EM data collection / processing</b>                                                                                                                                                                                                                   |                                         |
| Microscope                                                                                                                                                                                                                                               | FEI Titan Krios                         |
| Voltage (kV)                                                                                                                                                                                                                                             | 300                                     |
| Camera                                                                                                                                                                                                                                                   | Gatan K2 Summit                         |
| Set defocus range (μm)                                                                                                                                                                                                                                   | 0.6-2.0                                 |
| Defocus mean ± std (μm)                                                                                                                                                                                                                                  | 1.1 ± 0.6                               |
| Exposure time (s)                                                                                                                                                                                                                                        | 3.5                                     |
| Dose rate (e-/pixel/s)                                                                                                                                                                                                                                   | 4                                       |
| Total dose (e-/Å <sup>2</sup> )                                                                                                                                                                                                                          | 22.5                                    |
| Pixel size (Å)                                                                                                                                                                                                                                           | 0.788                                   |
| Number of micrographs                                                                                                                                                                                                                                    | 1,317                                   |
| Number of particles (processed)                                                                                                                                                                                                                          | 78,194                                  |
| Number of particles (in final map)                                                                                                                                                                                                                       | 30,515                                  |
| Symmetry                                                                                                                                                                                                                                                 | I                                       |
| Resolution (global) (Å)*                                                                                                                                                                                                                                 | 1.86                                    |
| Local Resolution Range                                                                                                                                                                                                                                   | 1.78 – 1.92                             |
| Directional Resolution Range                                                                                                                                                                                                                             | 1.86 – 1.86                             |
| Sphericity of 3DFSC                                                                                                                                                                                                                                      | 1.0                                     |
| Map sharpening                                                                                                                                                                                                                                           | Spectral flattening between 8 and 1.8 Å |
| *resolution assessment based on frequency-limited refinement using the 0.143 threshold for resolution analysis: S. H. Scheres and S. Chen, “Prevention of Overfitting in Cryo-EM Structure Determination,” Nat Methods 9, no. 9 (September 2012): 853–54 |                                         |
| <b>Model statistics</b>                                                                                                                                                                                                                                  |                                         |
| <b>AAV2<sub>L336C</sub></b>                                                                                                                                                                                                                              |                                         |
| Residue range                                                                                                                                                                                                                                            | 226 - 735                               |
| Map CC                                                                                                                                                                                                                                                   | 0.849                                   |
| RMSD [bonds] (Å)                                                                                                                                                                                                                                         | 0.01                                    |
| RMSD [angles] (Å)                                                                                                                                                                                                                                        | 0.93                                    |
| All-atom clashscore                                                                                                                                                                                                                                      | 7.97                                    |
| Ramachandran plot                                                                                                                                                                                                                                        |                                         |
| Favored (%)                                                                                                                                                                                                                                              | 97.2                                    |
| Allowed (%)                                                                                                                                                                                                                                              | 2.8                                     |
| Outliers                                                                                                                                                                                                                                                 | 0                                       |
| Rotamer outliers                                                                                                                                                                                                                                         | 0                                       |
| C-β deviations                                                                                                                                                                                                                                           | 0                                       |
| EM-Ringer Score                                                                                                                                                                                                                                          | 8.49                                    |

2

3



## 1 **Online Methods**

### 2 **Statistics**

3 For calculations of Fourier shell correlations (FSC), the FSC cut-off criterion of 0.143<sup>38</sup> was  
4 used.

### 6 **Production and purification of AAV2<sub>L336C</sub> virus-like particles.**

7 The AAV2<sub>L336C</sub> substitution was created within the AAV2 *cap* gene encoding all three viral  
8 proteins, VP1, VP2, and VP3, as previously described<sup>4</sup>. A recombinant baculovirus, encoding  
9 the AAV2 *cap* gene, with the L336C substitution, was created using the Bac-to-Bac system  
10 (Thermo Fisher). A plaque purified and titered baculovirus stock was used to infect *Sf9* insect  
11 cells, at a multiplicity of infectivity of 5 to generate virus-like particles (VLPs). The  
12 harvested pellet (from lysed cells and polyethylene glycol precipitated supernatant) was  
13 freeze/thawed three times with Benzonase (EMD Millipore Cat#712053) treatment. After the  
14 third thaw, the resulting clarified supernatant was purified using a step iodixanol gradient  
15 followed by anion exchange<sup>39</sup> and then dialyzed into 50 mM HEPES, pH 7.4 with 2 mM  
16 MgCl<sub>2</sub>, 150 mM NaCl. The sample concentration was determined by optical density  
17 assuming an extinction coefficient of 1.7 mg/(mL·cm) for AAV2 VLPs. The VLP purity and  
18 integrity were confirmed by sodium dodecyl sulfate polyacrylamide gel electrophoresis and  
19 negative stain EM on an FEI Spirit TEM, respectively.

20

### 21 **Single-Particle CryoEM Vitrification and Data Collection**

22 Double blotting was used to increase particle concentration<sup>40</sup>. 2.5 µl of AAV2<sub>L336C</sub> sample at  
23 2.5 mg/ml was added to a plasma-cleaned (Gatan Solarus) 1.2 µm hole, 1.3 µm spacing holey  
24 gold grid (Quantifoil UltraAuFoil) and blotted away using Whatman grade 4 filter paper after  
25 20s wait time. 2.5 µl of the same sample was then re-applied to the grid and blotted after 20s

1 wait time and then vitrified in liquid ethane using a manual plunger. All operations were  
2 performed in a 4°C cold room at >80% humidity to minimize evaporation and sample  
3 degradation.

4

## 5 **Data Acquisition**

6 Images were recorded on a Titan Krios electron microscope (FEI) equipped with a K2  
7 summit direct detector (Gatan) at 0.394 Å per pixel in super-resolution counting mode (0.788  
8 Å for the physical pixel size) using the Legicon software package<sup>34</sup>. Data collection was  
9 performed using a dose of  $\sim 22.5 \text{ e}^-/\text{Å}^2$  across 70 frames (50 msec per frame) at a dose rate of  
10  $\sim 4.0 \text{ e}^-/\text{pix}/\text{sec}$ , using a set defocus range of -0.6  $\mu\text{m}$  to -2  $\mu\text{m}$ . On our microscope, the 100  
11  $\mu\text{m}$  objective aperture would allow for transmission of information up to  $\sim 1.4 \text{ Å}$ , but could  
12 not be aligned to produce a coma-free diffractogram. In contrast, the 70  $\mu\text{m}$  aperture would  
13 truncate information at the  $\sim 2 \text{ Å}$  limit. For this reason, the objective aperture was removed to  
14 prevent physical truncation of the most widely scattering electrons – and thus the highest-  
15 resolution information. Removal of the objective aperture in this case has the benefit of  
16 eliminating this aperture as a potential source of image astigmatism. A total of 1,317  
17 micrographs were recorded over a single 3.5-day collection.

18

## 19 **Data Processing**

20 Movie frames were aligned using MotionCor2<sup>41</sup> with 5 by 5 patches, a grouping of 3 and B-  
21 factor of 100, and Fourier space binning of 2 (resulting in a pixel size of 0.788 Å/pixel)  
22 through the Appion software package<sup>36</sup>. Micrograph CTF estimation was performed using  
23 both CTFFind4<sup>42</sup> for whole micrographs and GCTF<sup>13</sup> for individual particles within the  
24 Appion software package. A subset of 8 micrographs was first used for particle picking using  
25 Gautomatch (Kai Zhang, unpublished), and particles were extracted and analyzed by 2D

1 classification in Relion 2.1<sup>11</sup>. 2D class averages that showed clear structural details were used  
2 as templates for template-based picking using Gautomatch on all 1,317 micrographs. A total  
3 of 78,194 particles were then extracted using a box size of 800 pixels and subjected to two  
4 initial rounds of 2D classification (binned by 4) to identify and discard false positives such as  
5 ice and other obvious contaminants. Following 2D classification, 36,620 particles were re-  
6 extracted with the re-centering option in Relion.

7  
8 3D refinements were performed first using Relion and finishing in *cis*TEM<sup>14</sup>, with the initial  
9 model generated by CryoSPARC<sup>43</sup>. Icosahedral symmetry was imposed during all 3D  
10 refinement steps, based on prior knowledge<sup>5</sup> of AAV2 structure. All conversions between  
11 Relion, CryoSPARC, and *cis*TEM were performed using Daniel Asarnow's pyem script  
12 (unpublished). An initial 3D refinement using 7 rounds of auto-refinement and 2 rounds of  
13 local refinement with binning of 2. Particles were discarded based on analysis of the "score"  
14 values in *cis*TEM leading to the removal of a distinct subset of particles with low scores  
15 (below 6 in this dataset). This resulted in 30,515 particles that were re-extracted, unbinned  
16 and used for all subsequent operations. Per-particle CTF refinements were performed within  
17 *cis*TEM. All final refinements used a ring-shaped mask with an inner diameter of 75 Å and  
18 an outer diameter of 150 Å to specifically include only the capsid density and exclude  
19 remaining solvent. For this dataset, and after applying the stack-filtering procedures  
20 described above, 3D classifications did not produce any noticeable further gains.

21  
22 Plotting the defocusV against defocusU values<sup>44</sup> showed a systematic scaling of the  
23 difference between these two values as a function of their magnitude. Using the  
24 mag\_distortion\_estimate software<sup>15</sup> and micrographs collected from a gold-coated cross  
25 grating replica grid (Supplementary Fig. 1), a magnification anisotropy of 1.10% was

1 calculated. The appropriate correction for magnification anisotropy was applied during frame  
2 alignment (see above). The particle stack that was re-extracted from magnification-  
3 anisotropy-corrected frame sums reached a resolution of 1.97 Å after derivation of an *ab*  
4 *initio* model in CryoSparc and refinement in *cis*TEM.

5  
6 The aligned movie frame stack was also split into individual frames and using the best Euler  
7 angles and shifts from above, reconstructions were computed using Frealign9. Frames 5-19,  
8 each of which independently exceeded a resolution of 2.24 Å, were summed and used for  
9 subsequent manual refinement (including CTF refinement) within *cis*TEM to obtain a  
10 reconstruction at 1.93 Å. The final reconstruction at 1.84 Å was computed after correcting for  
11 the curvature of the Ewald sphere using Frealign9. Rotational motion correction was  
12 performed in *cis*TEM by splitting each particle sum into groups of 5 frames (frames 5-9, 10-  
13 14, and 15-19), and refining each group-of-5 as if it were a single particle. Particle-frame-  
14 averages with score lower than 3 were removed, resulting in a final stack of 87,781  
15 “particles” that refined to 1.86 Å resolution. Although the nominal resolution at 0.143 cut-off  
16 was worse than without rotational frame alignment, inspection of the FSC curves and visual  
17 comparison of the two maps suggested that this procedure provided minor benefits. Notably,  
18 information at lower spatial frequencies was slightly improved within the reconstruction  
19 following rotational frame alignment.

20  
21 To generate maps of the opposite handedness, Euler angles of the particles were changed  
22 from ( $\phi$ ,  $\theta$ ,  $\psi$ ) to ( $-\phi$ ,  $180-\theta$ ,  $\psi$ ). Ewald sphere curvature corrected  
23 reconstructions of same and opposite handedness were done by setting IEWALD to either 1  
24 or -1 respectively in Frealign9.

25

## 1 **AAV2<sub>L336C</sub> model refinement**

2 For model refinement of the AAV2<sub>L336C</sub> variant, the deposited structure of AAV2 (PDB-ID:  
3 1LP3) was used as a starting template. A 60mer capsid model downloaded from VIPERdb<sup>45</sup>  
4 (<http://viperdbscripps.edu>) was docked into the map using the 'Fit-in-map' function in the  
5 Chimera<sup>46</sup> program. To optimize the correlation coefficient (CC) between the model and map  
6 the voxel (pixel) size of the map was adjusted. From the fitted 60mer, a monomer was  
7 extracted for the model building. For model building and real space refinement in the Coot<sup>47</sup>  
8 program, the map was converted from the Purdue Image Format (PIF) to the XPlor format  
9 using e2proc3D.py subroutine in the EMAN2<sup>48</sup> application and finally to the CCP4 format  
10 using MAPMAN<sup>49</sup>. In Coot<sup>47</sup> L336 in AAV2<sub>WT</sub> was substituted to a cysteine and the side-  
11 chain and main-chain atoms, including those of neighboring residues, adjusted to better fit  
12 the experimental density map using the real-space-refinement subroutine. After the manual  
13 refinement of the monomer was completed, a 60mer was regenerated in VIPERdb by T=1  
14 icosahedral matrix multiplication and the model refined against the cryo-EM map utilizing  
15 the real space, and B-factor refinement subroutines in the Phenix<sup>24</sup> program. The CC and  
16 refinement statistics, including root mean square deviations (RMSD), bond lengths and  
17 angles were analyzed by Phenix. Model adjustment and refinement were performed  
18 iteratively in Coot and Phenix, and the statistics were examined using Molprobity<sup>50</sup> until no  
19 further improvements were observed. The final map and model were then validated using 1)  
20 EMRinger<sup>23</sup> to compare map to model, 2) SPARX<sup>28</sup> to calculate map local resolution and 3)  
21 3DFSC program suite<sup>27</sup> to calculate degree of directional resolution anisotropy through the  
22 3DFSC.

23

24

## 1 Online Methods References

- 2 29. Russo, C.J. & Passmore, L.A. Ultrastable gold substrates for electron cryomicroscopy. *Science*  
3 **346**, 1377-1380 (2014).
- 4 30. Glaeser, R.M., Typke, D., Tiemeijer, P.C., Pulokas, J. & Cheng, A. Precise beam-tilt alignment  
5 and collimation are required to minimize the phase error associated with coma in high-  
6 resolution cryo-EM. *Journal of structural biology* **174**, 1-10 (2011).
- 7 31. Li, X. et al. Electron counting and beam-induced motion correction enable near-atomic-  
8 resolution single-particle cryo-EM. *Nature methods* **10**, 584 (2013).
- 9 32. McMullan, G., Faruqi, A., Clare, D. & Henderson, R. Comparison of optimal performance at  
10 300 keV of three direct electron detectors for use in low dose electron microscopy.  
11 *Ultramicroscopy* **147**, 156-163 (2014).
- 12 33. Brilot, A.F. et al. Beam-induced motion of vitrified specimen on holey carbon film. *Journal of*  
13 *structural biology* **177**, 630-637 (2012).
- 14 34. Suloway, C. et al. Automated molecular microscopy: the new Legimon system. *Journal of*  
15 *structural biology* **151**, 41-60 (2005).
- 16 35. Xie, Q. et al. The atomic structure of adeno-associated virus (AAV-2), a vector for human  
17 gene therapy. *Proceedings of the National Academy of Sciences* **99**, 10405-10410 (2002).
- 18 36. Lander, G.C. et al. Appion: an integrated, database-driven pipeline to facilitate EM image  
19 processing. *J Struct Biol* **166**, 95-102 (2009).
- 20 37. Passos, D.O. & Lyumkis, D. Single-particle cryoEM analysis at near-atomic resolution from  
21 several thousand asymmetric subunits. *Journal of structural biology* **192**, 235-244 (2015).
- 22 38. Rosenthal, P.B. & Henderson, R. Optimal determination of particle orientation, absolute  
23 hand, and contrast loss in single-particle electron cryomicroscopy. *J Mol Biol* **333**, 721-745  
24 (2003).
- 25 39. Drouin, L.M. et al. Cryo-electron microscopy reconstruction and stability studies of the wild  
26 type and the R432A variant of adeno-associated virus type 2 reveal that capsid structural  
27 stability is a major factor in genome packaging. *Journal of virology* **90**, 8542-8551 (2016).
- 28 40. Snijder, J. et al. Vitrification after multiple rounds of sample application and blotting  
29 improves particle density on cryo-electron microscopy grids. *Journal of structural biology*  
30 **198**, 38-42 (2017).
- 31 41. Zheng, S.Q. et al. MotionCor2: anisotropic correction of beam-induced motion for improved  
32 cryo-electron microscopy. *Nat Methods* **14**, 331-332 (2017).
- 33 42. Rohou, A. & Grigorieff, N. CTFFIND4: Fast and accurate defocus estimation from electron  
34 micrographs. *J Struct Biol* **192**, 216-221 (2015).
- 35 43. Punjani, A., Rubinstein, J.L., Fleet, D.J. & Brubaker, M.A. cryoSPARC: algorithms for rapid  
36 unsupervised cryo-EM structure determination. *Nat Methods* **14**, 290-296 (2017).
- 37 44. Zhao, J., Brubaker, M.A., Benlekbir, S. & Rubinstein, J.L. Description and comparison of  
38 algorithms for correcting anisotropic magnification in cryo-EM images. *Journal of structural*  
39 *biology* **192**, 209-215 (2015).
- 40 45. Shepherd, C.M. et al. VIPERdb: a relational database for structural virology. *Nucleic acids*  
41 *research* **34**, D386-D389 (2006).
- 42 46. Pettersen, E.F. et al. UCSF Chimera—a visualization system for exploratory research and  
43 analysis. *Journal of computational chemistry* **25**, 1605-1612 (2004).
- 44 47. Emsley, P. & Cowtan, K. Coot: model-building tools for molecular graphics. *Acta*  
45 *Crystallographica Section D: Biological Crystallography* **60**, 2126-2132 (2004).
- 46 48. Tang, G. et al. EMAN2: an extensible image processing suite for electron microscopy. *Journal*  
47 *of structural biology* **157**, 38-46 (2007).
- 48 49. Kleywegt, G.J. & Jones, T.A. xdlMAPMAN and xdlDATAMAN—programs for reformatting,  
49 analysis and manipulation of biomacromolecular electron-density maps and reflection data  
50 sets. *Acta Crystallographica Section D: Biological Crystallography* **52**, 826-828 (1996).

- 1 50. Chen, V.B. et al. MolProbity: all-atom structure validation for macromolecular  
2 crystallography. *Acta Crystallographica Section D: Biological Crystallography* **66**, 12-21  
3 (2010).  
4  
5  
6
